# Supplementary material
Source: PubMed Central journal article supplement (PMC151215)
Supplement: plntcell_14_12_3237__1.pdf [file plntcell_14_12_3237__1.pdf]

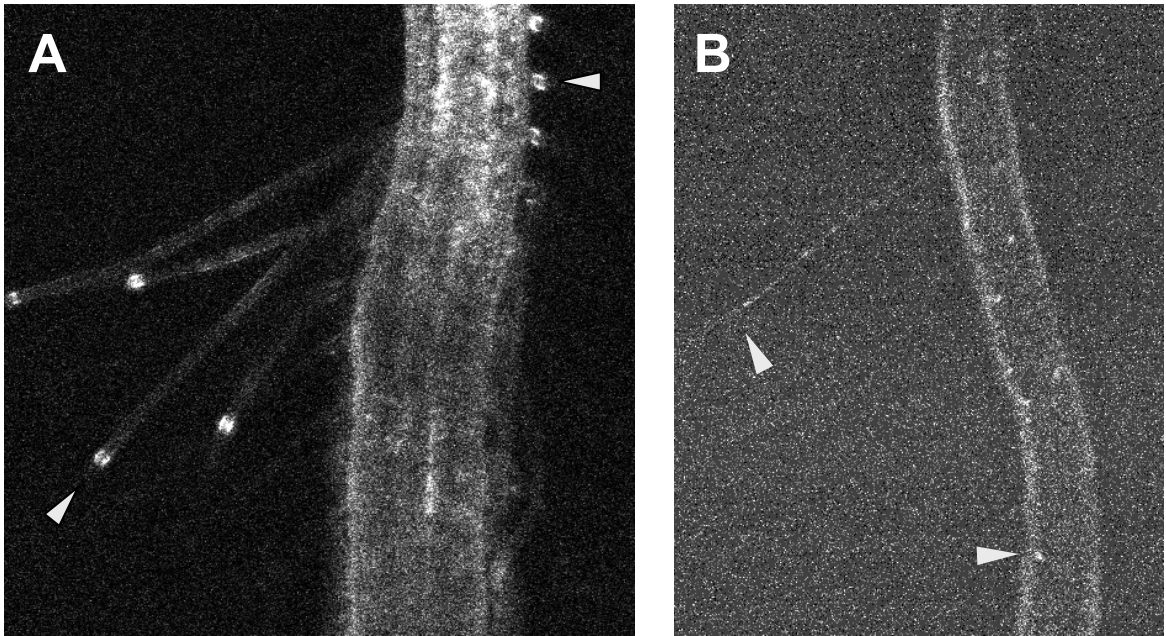

**Supplemental Figure 1.** Confocal microscopy images of roots harboring the E7G1 gain-of-function promoter of *AtEXP7* (fused to GFP). GFP fluorescence is clearly observed in root hairs as indicated by the arrow heads (**A**, **B**). The weak striped pattern of fluorescence (**A**) and the fluorescence spots, which are from the base of root hairs (**B**) along the root, are not detected in the mp35S control (see Figure 9E). Brightness of the images was increased to show the weak fluorescence signals.
